# Supplementary figures and images for: The Importance of Protein Phosphorylation for Signaling and Metabolism in Response to Diel Light Cycling and Nutrient Availability in a Marine Diatom
Source: MDPI journal article supplement (doi:10.3390/biology9070155), 2020-07-06

**DUR3**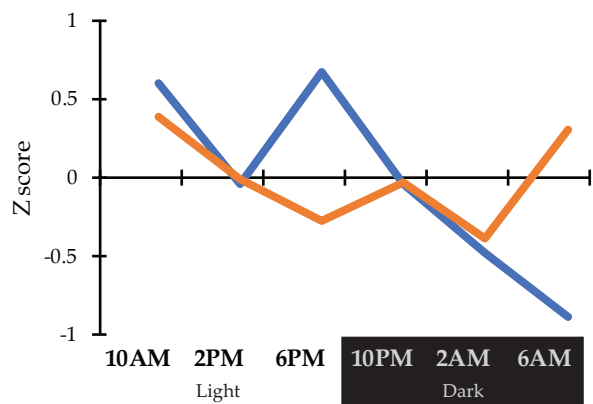**P0**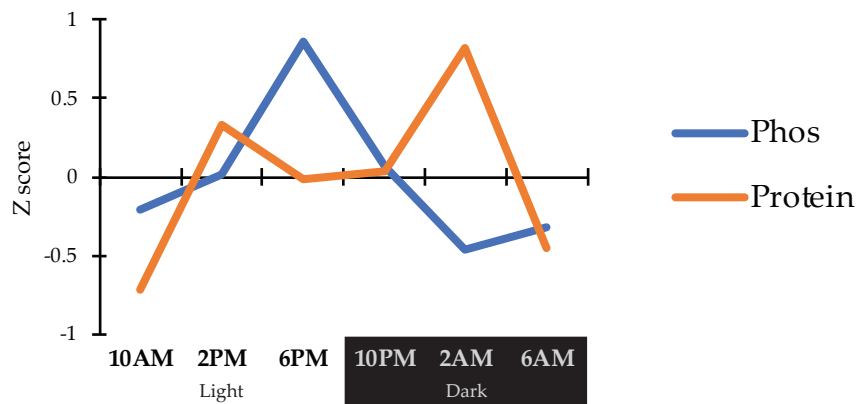**pgCPS**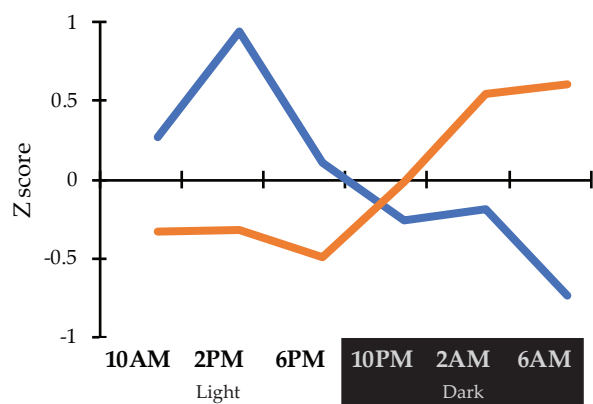**EF3A**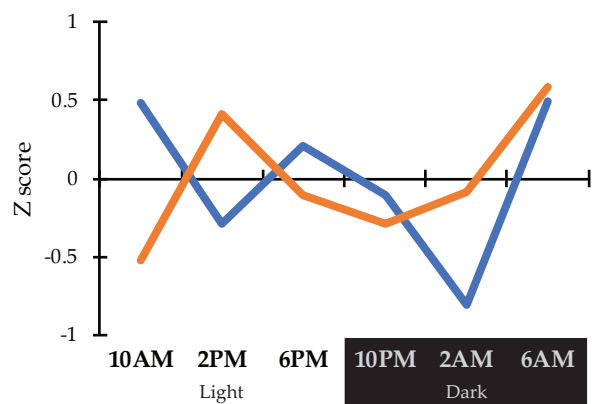**VSP**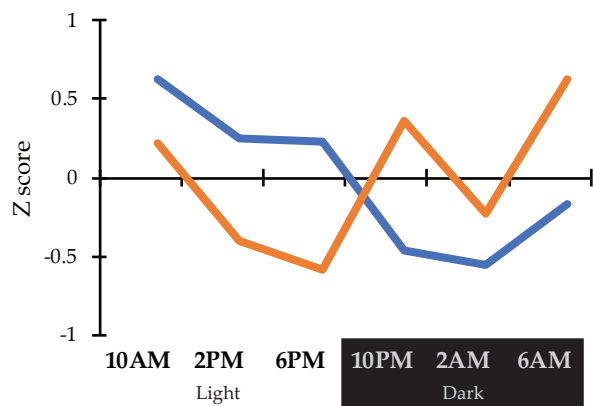**eEF2K**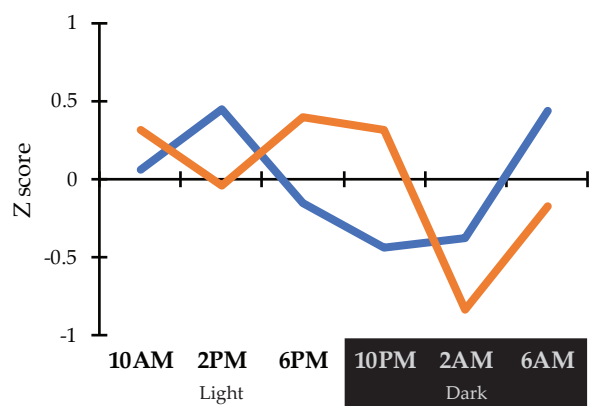**S9**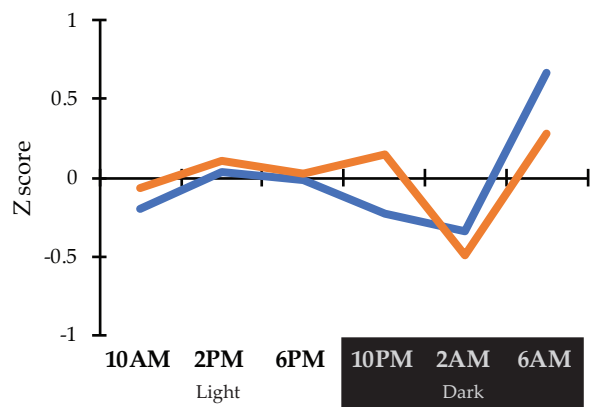

Supplement: s1 [file s1]

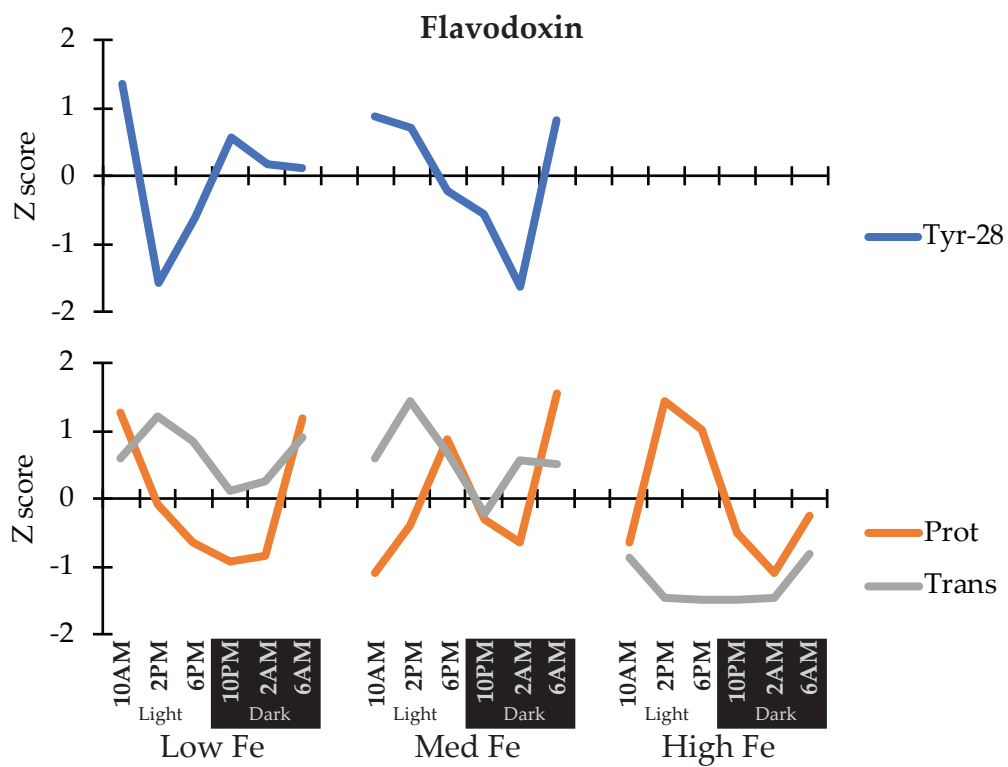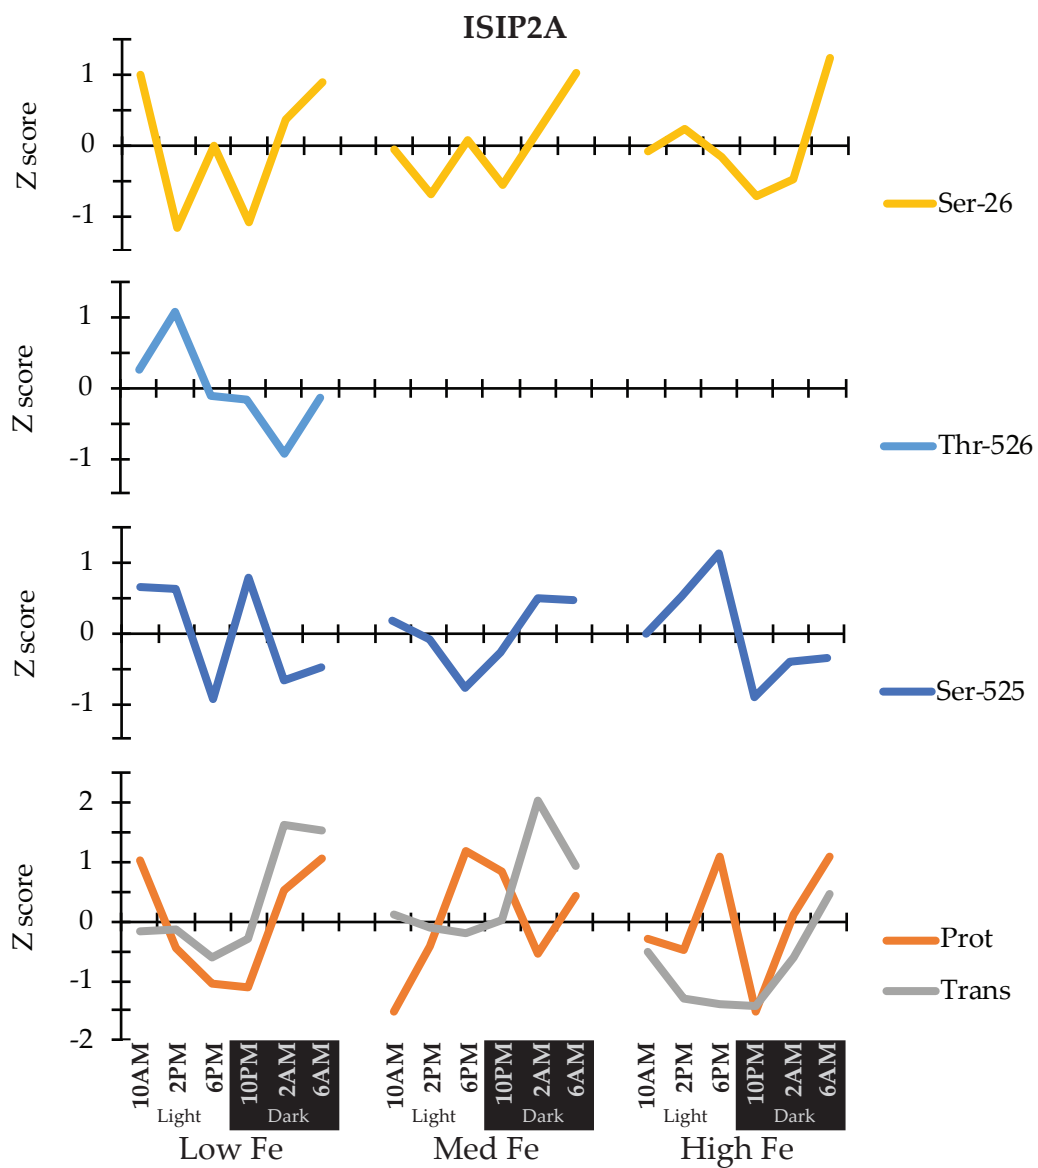

Supplement: s1 [file s1]

# Nshort Transcriptome

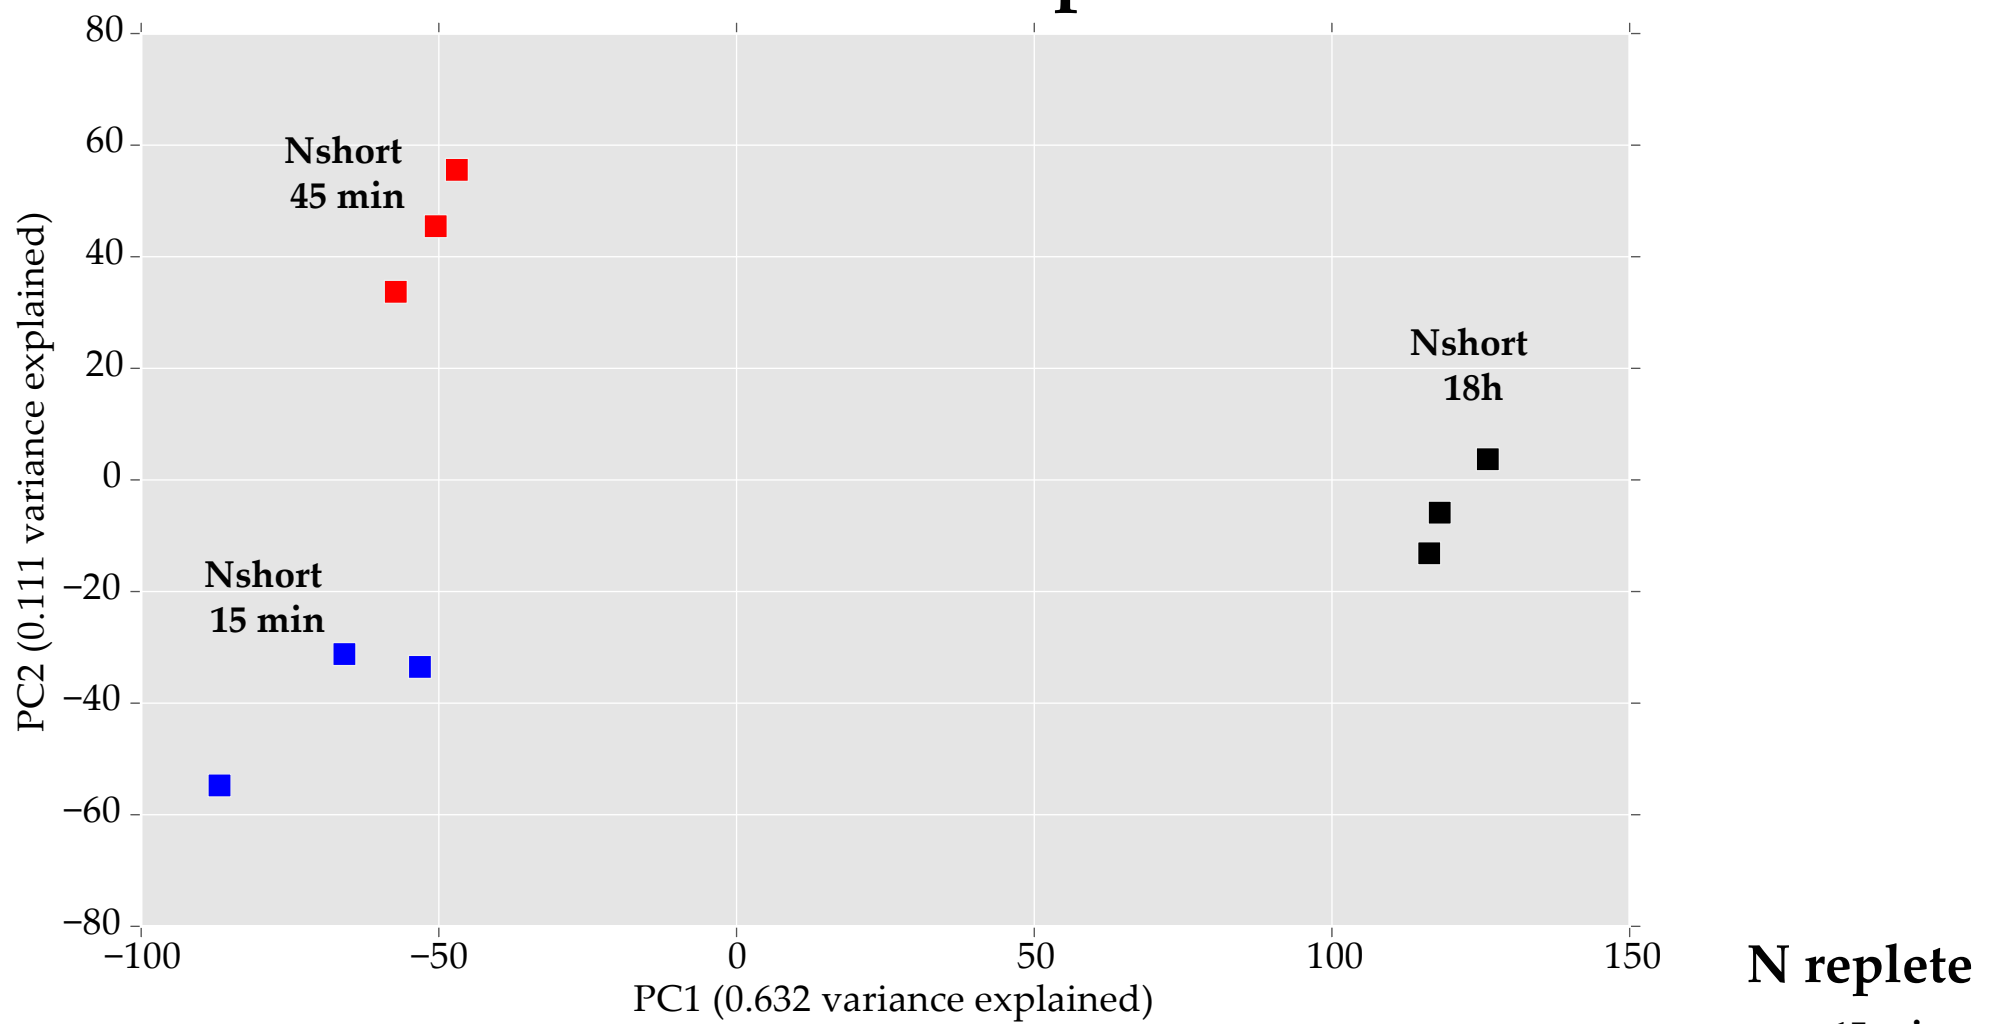

# Nshort Proteome

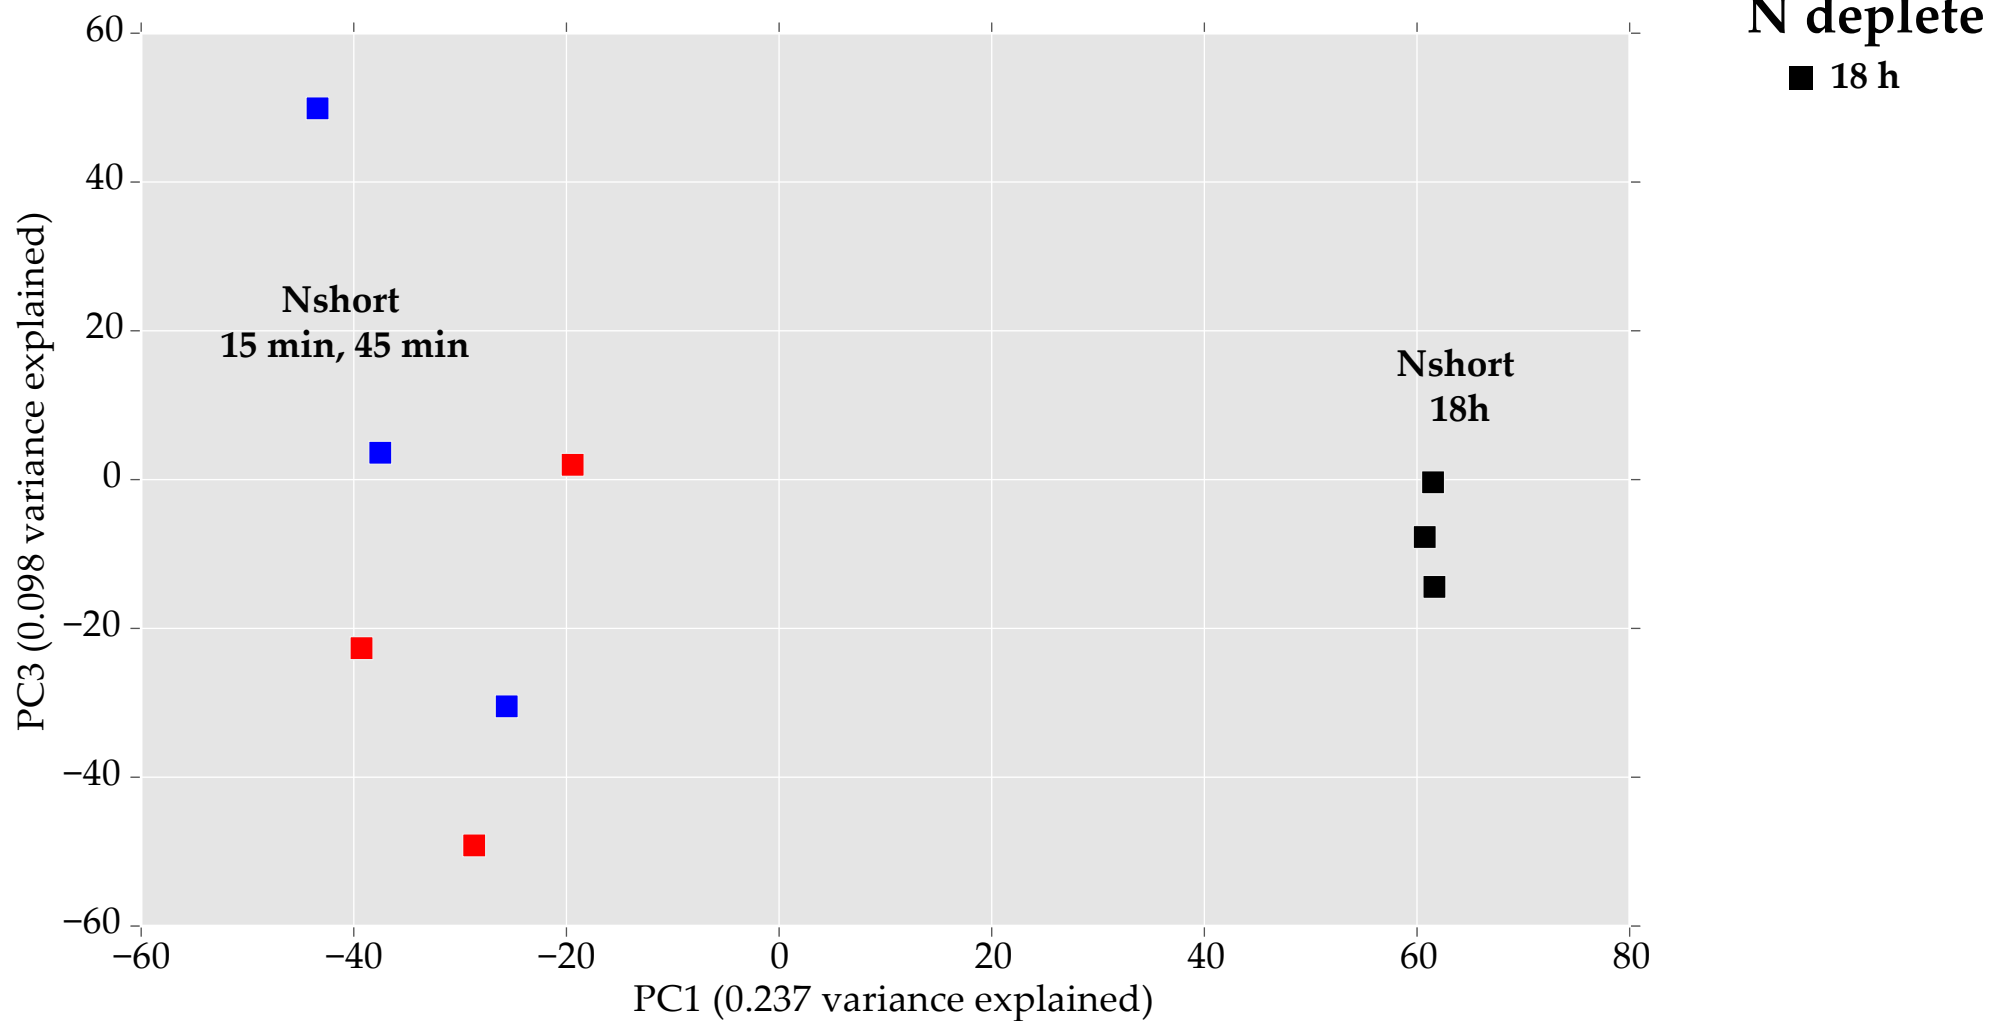

Supplement: s1 [file s1]
